# Supplementary material for: Testing, diagnosis, and treatment following the implementation of a program to provide dried blood spot testing for HIV and hepatitis C infections: the NSW DBS Pilot
Source: Springer Nature journal article supplement (doi:10.1186/s12879-024-08989-8), 2024-01-29
Supplement: MOESM1 [file 26672310]

Supplementary Figure 1: Visual aid contained in DBS sampling kit from December 2017



**DRIED BLOOD  
SPOT SAMPLE  
COLLECTION  
INSTRUCTIONS**

**1 Register online**



Go to [www.health.nsw.gov.au/dbstest](http://www.health.nsw.gov.au/dbstest) to get your validation code.

**2 Check kit contents**



**3 Write name, date of birth and validation code on test card**



Your validation code was sent to your phone or email

**4 Wash hands with warm water**



**5 Wipe finger with alcohol swab and allow to dry**



**6 Prick finger with lancet**



Twist off cap

Push hard against finger and push until it "clicks"

"CLICK"

**7 Squeeze blood onto card**



Large drop of blood into each circle

Minimum 3 full spots required

**8 Wipe finger and apply band-aid**



**9 Allow test card to dry**



4+ HOURS

When dry, fold the flap of the test card over the blood spots

**10 Pack test kit into foil envelope and reply paid envelope**



**11 Post test kit**



Free postage – no stamp required

**Need help?**

Watch the video at [www.health.nsw.gov.au/dbstest](http://www.health.nsw.gov.au/dbstest)

Or call Sexual Health Infolink on 1800 451 624



Supplementary Figure 2: HIV and HCV DBS screening laboratory testing algorithm

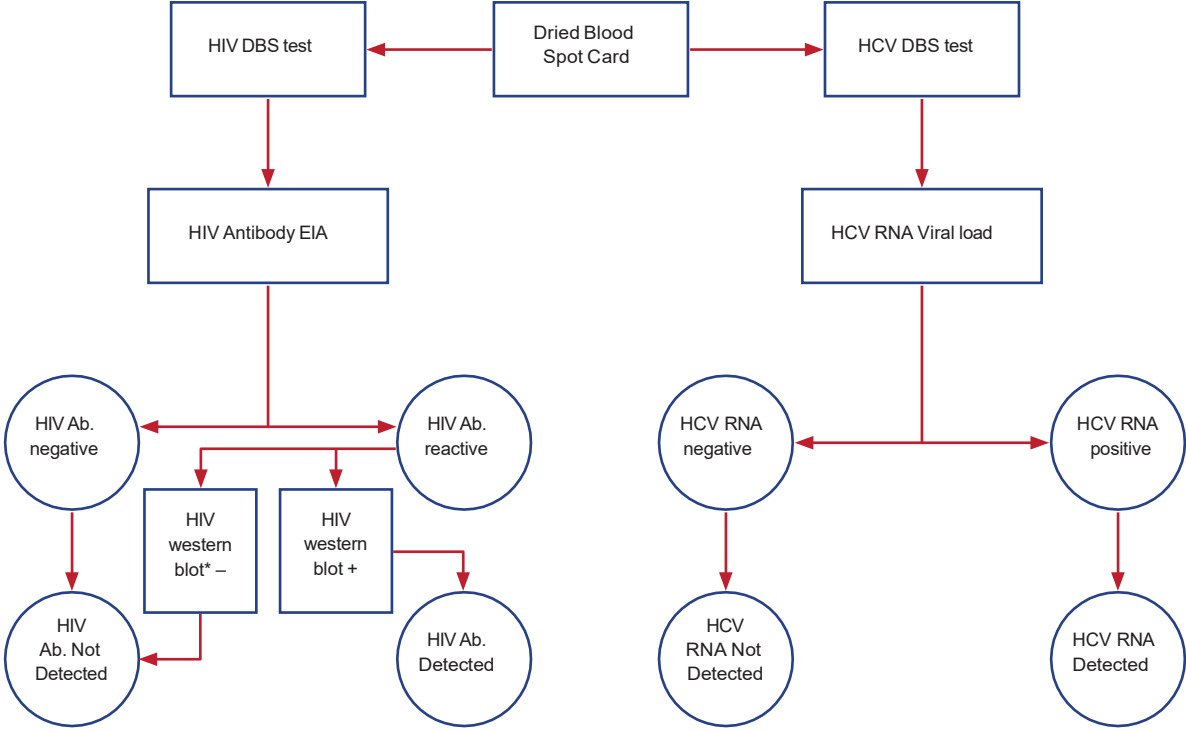

Assay detail:  
 HIV Ab/Ag EIA: Diasorin Murex HIV Ab/Ag ELISA  
 HIV Western Blot: Biorad HIV New LAV Blot II  
 (\* indeterminate blot requires conventional venepuncture  
 HCV RNA viral load: Hologic Aptima HCV Quant Dx (1,2,3)
